# Supplementary material for: SMARTER crystallography of the fluorinated inorganic–organic compound Zn3Al2F12·[HAmTAZ]6
Source: Royal Society of Chemistry journal article supplement (doi:10.1039/c2dt30100h), 2012-01-01
Supplement: c2dt30100h.pdf [file c2dt30100h.pdf]

## SMARTER Crystallography of the fluorinated organic-inorganic compound

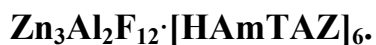

Charlotte Martineau, Amandine Cadiou, Boris Bouchevreau, Jürgen Senker, Francis Taulelle,  
Karim Adil

### Electronic Supplementary Information

#### Table of content

|                                                                                                                                                                                                                                               |   |
|-----------------------------------------------------------------------------------------------------------------------------------------------------------------------------------------------------------------------------------------------|---|
| <b>Table 1.</b> Conditions of X-ray data collection of $\text{Zn}_3\text{Al}_2\text{F}_{12}\cdot[\text{HAmTAZ}]_6$ .....                                                                                                                      | 2 |
| <b>Fig. 1.</b> Experimental and calculated XRPD diagram of $\text{Zn}_3\text{Al}_2\text{F}_{12}\cdot[\text{HAmTAZ}]_6$ .....                                                                                                                  | 3 |
| <b>File 1.</b> Instruction file for the space group determination of $\text{Zn}_3\text{Al}_2\text{F}_{12}\cdot[\text{HAmTAZ}]_6$ .....                                                                                                        | 3 |
| <b>File 2.</b> Output file for the space group determination of $\text{Zn}_3\text{Al}_2\text{F}_{12}\cdot[\text{HAmTAZ}]_6$ .....                                                                                                             | 4 |
| <b>Fig. 2.</b> Differences between the fractional atomic positions of the DFT-optimized structure and of the model determined from single-crystal X-ray diffraction in $\text{Zn}_3\text{Al}_2\text{F}_{12}\cdot[\text{HAmTAZ}]_6$ .<br>..... | 5 |

**Table 1.** Conditions of single-crystal X-ray data collection and refinement parameters of  $\text{Zn}_3\text{Al}_2\text{F}_{12} \cdot [\text{HAMTAZ}]_6$

|                                      |                                   |
|--------------------------------------|-----------------------------------|
| Formula                              | C12 H24 Al2 F12 N24 Zn3           |
| Formula weight                       | 982.62                            |
| Crystal system, space group          | Hexagonal, R -3                   |
| a                                    | 12.5761(5) 17.6463(9)             |
| Volume, Z                            | 2417.0(2), 3                      |
| Crystal size                         | 0.24 x 0.14 x 0.08 mm             |
| 2Theta range (°)                     | 5.94 to 55 deg.                   |
| Reflections collected / unique       | 4706 / 1037                       |
| Max. and min. transmission           | 0.7454, 0.6462                    |
| Data / restraints / parameters       | 1037 / 0 / 84                     |
| Goodness-of-fit                      | 1.083                             |
| Final R indices [ $I > 2\sigma(I)$ ] | R1 = 0.0216, wR2 = 0.0583         |
| R indices (all data)                 | R1 = 0.0233, wR2 = 0.0593         |
| Largest diff. peak and hole          | 0.331 and -0.373 e. <sup>-3</sup> |
| CCDC number                          | 863484                            |

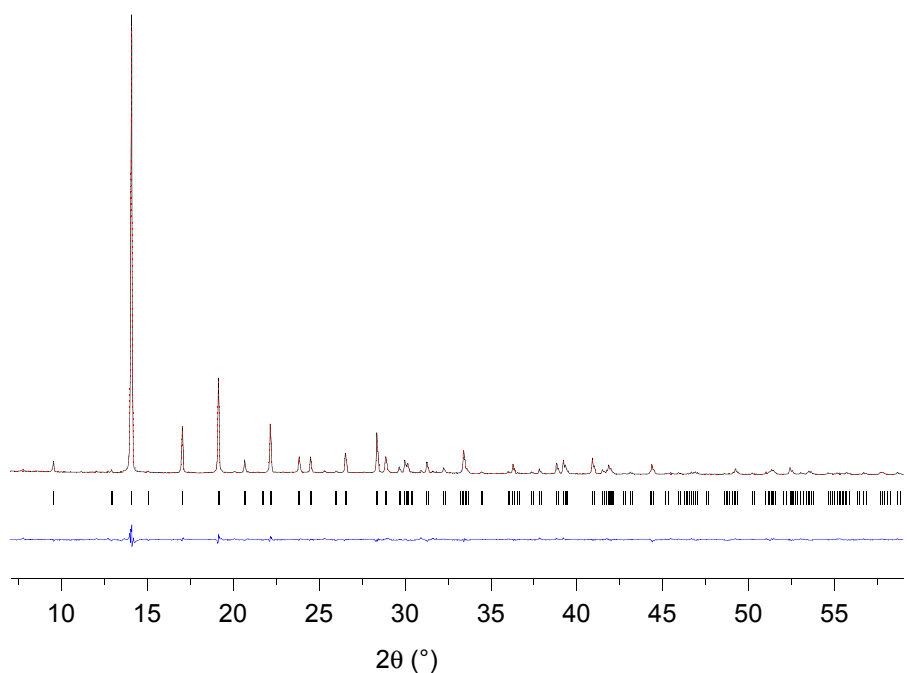

**Fig. 1.** Experimental (dark line) and calculated (red dots) XRPD diagram of  $\text{Zn}_3\text{Al}_2\text{F}_{12}\cdot[\text{HAMTAZ}]_6$  in the  $9\text{-}40^\circ$   $2\theta$  region. The Bragg positions (black ticks) and the difference between experimental and calculated data (blue line) are shown below.

**File 1.** Instruction file for the space group determination of  $\text{Zn}_3\text{Al}_2\text{F}_{12}\cdot[\text{HAMTAZ}]_6$ . The program used to run the calculation is available upon request to the corresponding author.

```
! Nuclei labels (on each line all data must be separated only by spaces)
Al F H C Zn
! Stoichiometric coefficients of precedent nuclei
2 12 24 12 3
! Crystal System Code ! Z Code ! Molar Mass (opt) ! Density (opt) ! Needed Cell Parameters (opt)
5 3
! Relative intensities of the different NMR lines (1 line per nucleus)
1
1 1
1 1 1 1
1 1
```

```
1 2
! Symetry Code of each precedent line (1 line per nucleus)
1
1 1
1 1 1 1
1 1
1 1

! Codes Information
!
! Crystal System Code (and optionally needed cell parameters if Z=0)
! 1 Triclinic ; a b c alpha beta gamma
! 2 Monoclinic (b or c unique) ; a b c beta/gamma
! 3 Orthorhombic ; a b c
! 4 Tetragonal ; a c
! 5 Trigonal-h (hexagonal axes) ; a c
! 6 Trigonal-r (rhombohedral axes) ; a alpha
! 7 Hexagonal ; a c
! 8 Cubic ; a
!
! Z Code
! Z if known
! 0 if unknown but if Molar Mass, Density and Cell Parameters are known => the Z will be calculated.
! any negative number if unknown. Several Z values will be tried.
!
! Symetry Code
! 0 if eta=0
! 1 in all other cases
```

**File 2.** Output file for the space group determination of  $Zn_3Al_2F_{12} \cdot [HAmTAZ]_6$ . The program used to run the calculation is available upon request to the corresponding author.

```
For Z=3,
(Partial) Chemical Formula : Al2F12H24C12Zn3
(Partial) Crystallochemical Formula : Al6F18F18H18H18H18H18C18C18Zn3Zn6
3 possible space groups :
R-3 (148)
R32 (155)
R-3m (166)
```

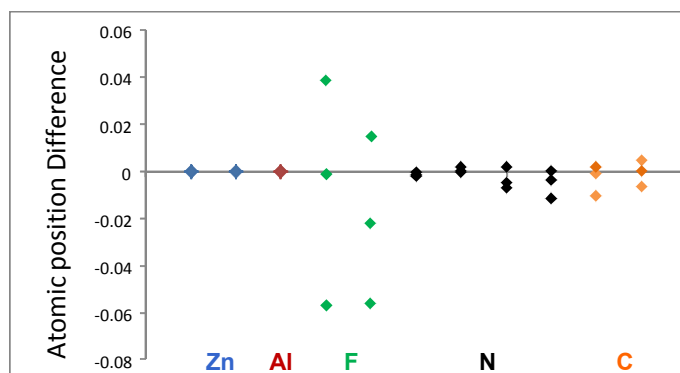

**Fig. 2.** Differences between the fractional atomic positions of the DFT-optimized structure and the model determined from single-crystal X-ray diffraction in  $\text{Zn}_3\text{Al}_2\text{F}_{12}[\text{HAmTAZ}]_6$ .
